# Supplementary material
Source: HighWire-hosted journal article supplement (https://ajnr-sso.highwirestaging.com/highwire/filestream/54676/field_highwire_adjunct_files/0/16-01039.pdf)
Supplement: 16-01039.pdf [file 16-01039.pdf]

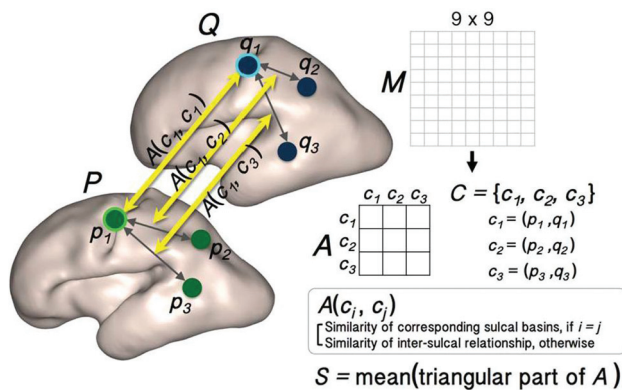

**ON-LINE FIG 1.** Description of sulcal pattern matching and similarity measurement between different 2 brains.  $M$  is a matrix to store the similarities of all candidate assignments ( $9 [= 3 \text{ nodes} \times 3] \times 9$ ) and their pair-wise similarities. The  $M$  is used to choose a subset matrix  $A$  of the consistent assignments set  $C$ . The  $c_1, c_2$ , and  $c_3$  are consistent assignments (optimally matched pairs).  $A(c_j, c_i)$  is a similarity of the assignment  $c_i$  of  $p_i$  and  $q_i$ , and  $A(c_j, c_i)$  is a similarity that measures how much the relationship between  $p_i$  and  $p_j$  is similar to the relationship between  $q_i$  and  $q_j$ .  $S$  is a global similarity between sulcal sets  $P$  and  $Q$ .

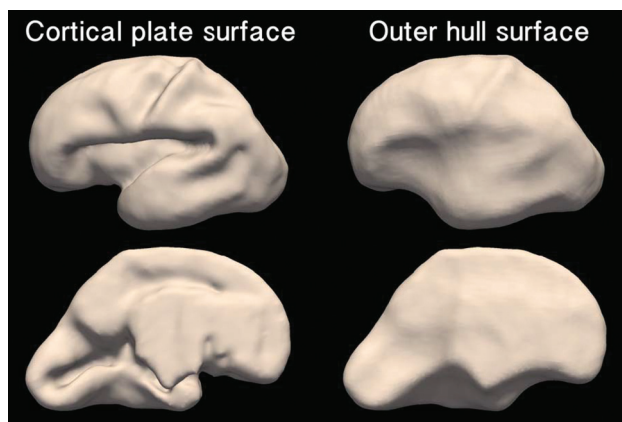

**ON-LINE FIG 2.** An example of cortical plate and outer hull surfaces for an individual fetal brain (27 GW).

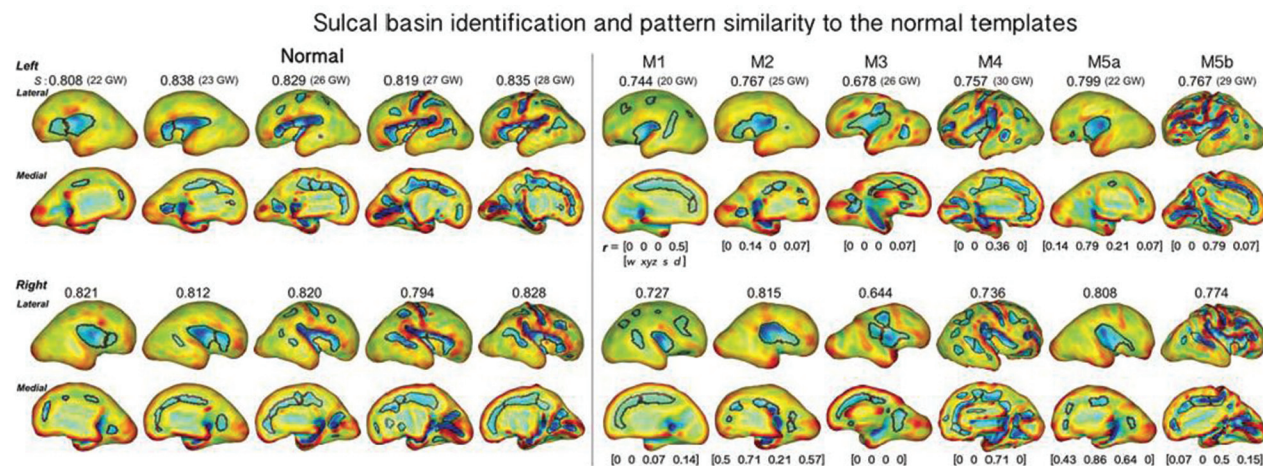

**ON-LINE FIG 3.** Sulcal pattern similarity ( $S$ ) to the templates measured with the whole set of features for 5 normal and all abnormal fetal brains. The ratios ( $r$ ) are the quantification of the deviation from the normal controls with the whole feature set and each of the 3 components ( $w$ : whole feature set;  $xyz$ : 3D position;  $s$ : sulcal basin area;  $d$ : sulcal depth).
